# Supplementary material for: pH-sensitive pullulan-based nanoparticles for intracellular drug delivery
Source: Royal Society of Chemistry journal article supplement (doi:10.1039/c3py00817g), 2013-08-29
Supplement: c3py00817g.pdf [file c3py00817g.pdf]

## SUPPLEMENTARY INFORMATION

### pH-sensitive pullulan-based nanoparticles for the intracellular drug delivery

Yinsong Wang,<sup>\*a</sup> Yang Liu,<sup>a</sup> Yuanyuan Liu,<sup>a</sup> Yan Wang,<sup>a</sup> Jing Wu,<sup>b</sup> Rongshan Li,<sup>a</sup>

Jinrong Yang<sup>a</sup> and Ning Zhang<sup>\*ab</sup>

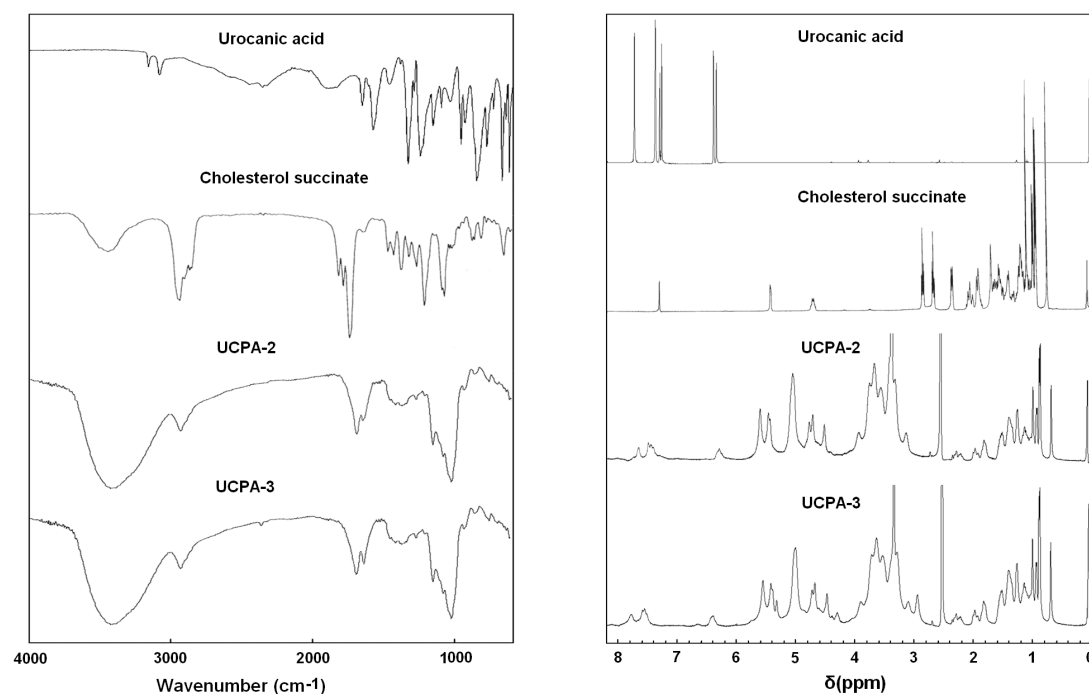

Fig. S1 IR (a) and <sup>1</sup>H NMR spectra (b) of urocanic acid, cholesterol succinate, UCPA-2, and UCPA-3.
